# Supplementary material for: Technical Efficiency and Its Determinants of Rice Production in Cambodia
Source: Preprints.org preprint supplement (doi:10.20944/preprints201608.0004.v2), 2016-09-13
Supplement: Supplementary file 1 [file supplementary]

**Table 1.** Input and output summary statistics for 25 rice producing provinces in Cambodia, 2012-2015

| Variable                                 | 2012    |        | 2013    |        | 2014    |        | 2015    |        |
|------------------------------------------|---------|--------|---------|--------|---------|--------|---------|--------|
|                                          | Mean    | S.E.   | Mean    | S.E.   | Mean    | S.E.   | Mean    | S.E.   |
| Output                                   |         |        |         |        |         |        |         |        |
| <i>Rice quantity</i> <sup>1</sup> (tons) | 290,808 | 52,994 | 329,872 | 60,296 | 391,150 | 80,437 | 315,270 | 57,785 |
| Inputs                                   |         |        |         |        |         |        |         |        |
| <i>Land</i> <sup>2</sup> (hectares)      | 134,629 | 23,192 | 144,944 | 25,893 | 212,785 | 56,497 | 145,685 | 26,699 |
| <i>Labor</i> <sup>3</sup> (persons)      | 168,703 | 27,044 | 163,805 | 26,208 | 160,163 | 25,683 | 155,159 | 24,486 |
| <i>Fertilizer</i> <sup>4</sup> (tons)    | 74,061  | 13,236 | 75,027  | 13,300 | 160,043 | 13,436 | 79,038  | 13,618 |
| <i>Pesticide</i> <sup>5</sup> (tons)     | 45,116  | 9,610  | 47,926  | 10,021 | 52,205  | 10,596 | 56,117  | 11,047 |
| <i>Machinery</i> <sup>6</sup> (units)    | 10,196  | 1,937  | 12,213  | 2,135  | 14,569  | 2,394  | 16,762  | 2,675  |

Source: Measured by Ms. Excel 2016 using combined datasets of RGC [32, 33]. "S.E." = Standard Error.

<sup>1</sup> *Rice quantity* was the total provincial un-milled rice production output quantity, measured in tons

<sup>2</sup> *Land* input was the total area of rice actually harvested within the year (included both in wet and dry season), measured in hectares

<sup>3</sup> *Labor* input measured as total farmers in the province with rice farming as primary occupation, unit in persons

<sup>4</sup> *Fertilizer* input was total amount of chemical and organic fertilizers' quantity using by total rice families in the province, unit in tons

<sup>5</sup> *Pesticide* input measured as total amount of chemical and organic poisons for insects and grass's quantity using by total rice families in the province, unit in tons

<sup>6</sup> *Machinery* measured the capital investment on agricultural machineries was the total amount of tractors, walking tractors (koryons), and rice transplanting machines existing in the provincial territory, unit in units

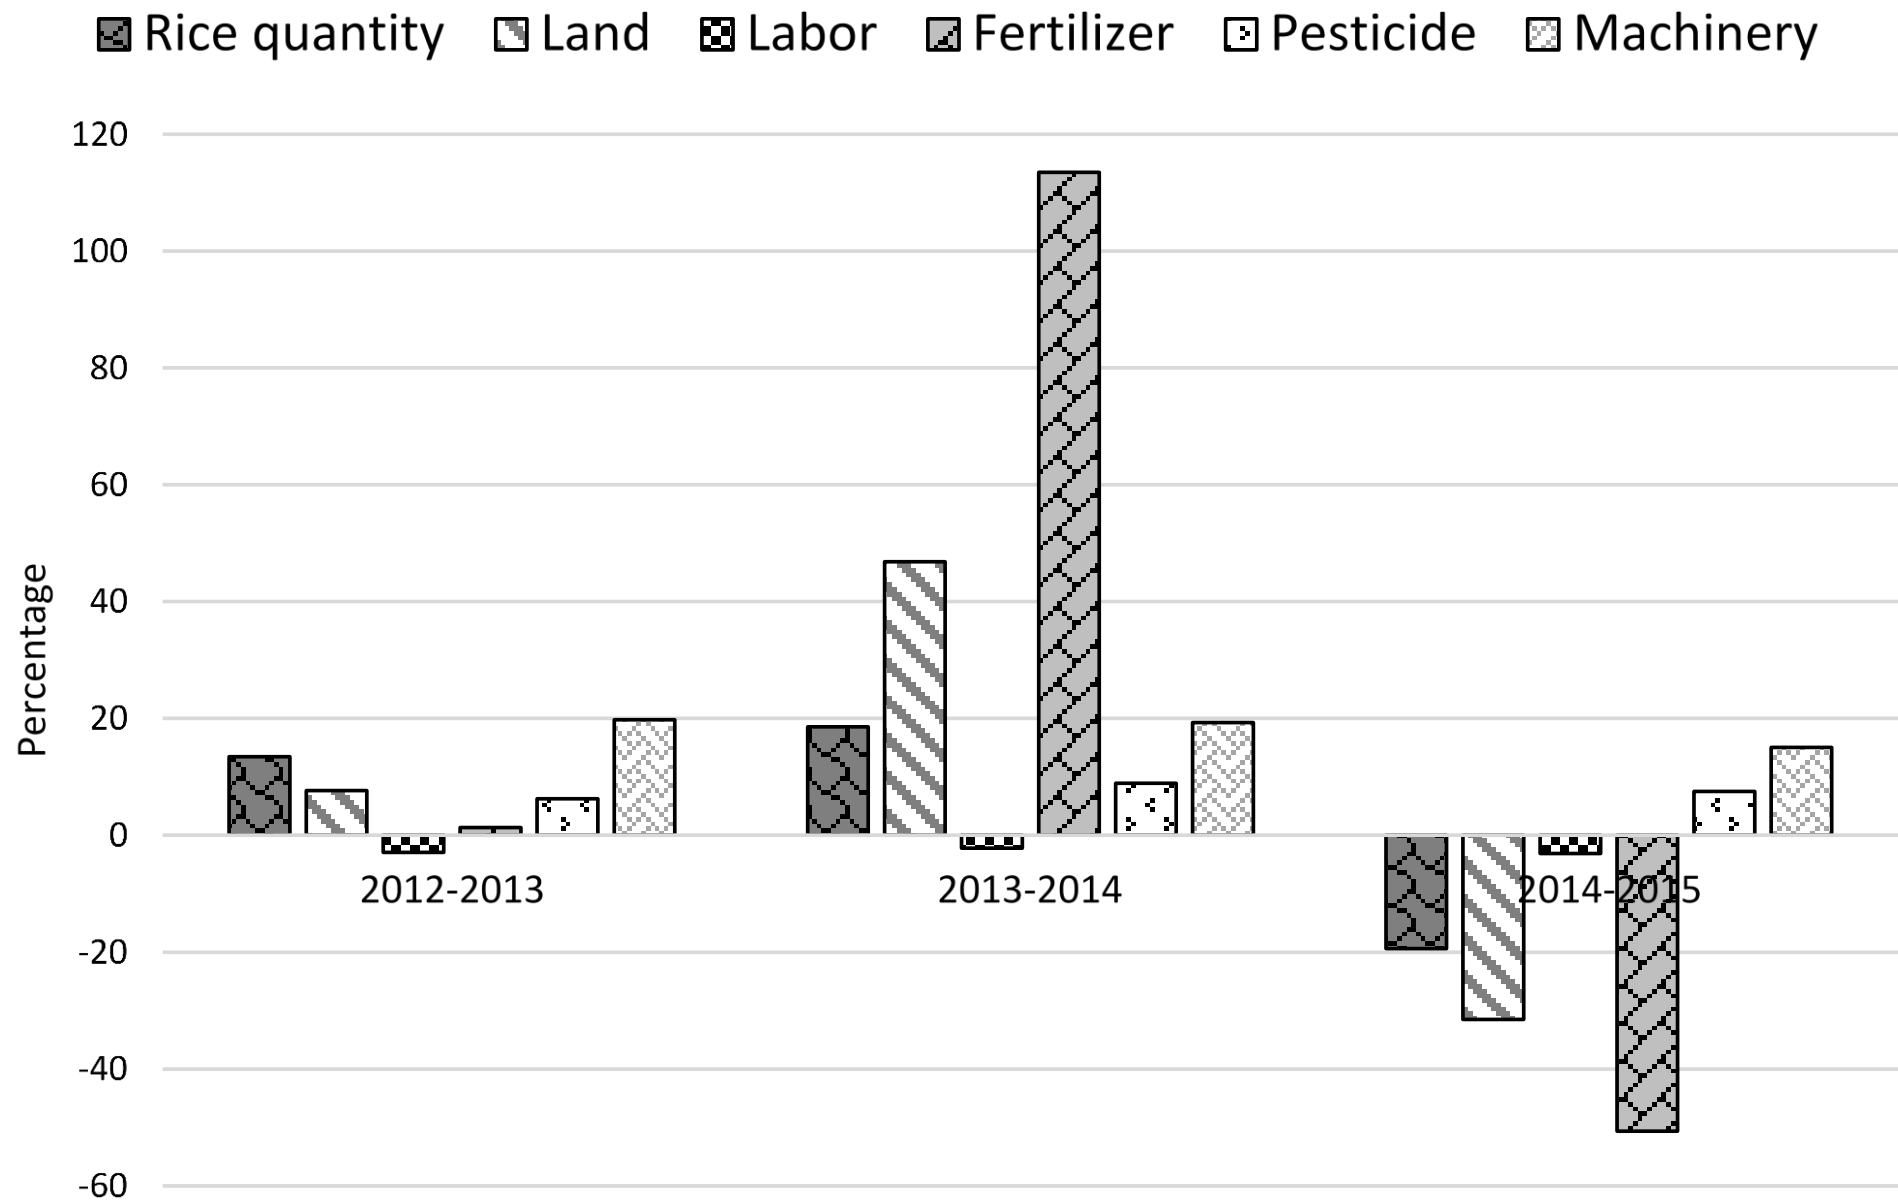

**Figure 1.** Percentage changes in input and output statistics for 25 rice producing provinces in Cambodia for the periods 2012-2013, 2013-2014, and 2014-2015

**Table 2** Descriptive statistics of factors affecting the efficiency of rice production in Cambodia, 2012-2015

| Variable                                 | 2012  |       | 2013  |      | 2014  |       | 2015  |      |
|------------------------------------------|-------|-------|-------|------|-------|-------|-------|------|
|                                          | Mean  | S.E.  | Mean  | S.E. | Mean  | S.E.  | Mean  | S.E. |
| <i>Disaster</i> <sup>1</sup>             | 18.86 | 12.34 | 5.16  | 1.12 | 30.98 | 26.37 | 5.20  | 1.16 |
| <i>Irrigation</i> <sup>2</sup>           | 21.70 | 3.49  | 22.75 | 3.52 | 19.94 | 3.58  | 22.64 | 3.54 |
| <i>Production technique</i> <sup>3</sup> | 3.04  | 0.48  | 2.79  | 0.47 | 2.74  | 0.42  | 2.44  | 0.37 |
| <i>Distant info-source</i> <sup>4</sup>  | 14.92 | 1.53  | 14.86 | 1.22 | 14.67 | 1.14  | 15.01 | 1.20 |
| <i>Supporting staffs</i> <sup>5</sup>    | 0.11  | 0.03  | 0.10  | 0.02 | 0.09  | 0.02  | 0.09  | 0.02 |
| <i>Dry-season prod.</i> <sup>6</sup>     | 68.47 | 5.72  | 58.76 | 6.33 | 65.12 | 5.89  | 64.91 | 6.43 |
| <i>Small-land farmers</i> <sup>7</sup>   | 41.80 | 3.17  | 40.99 | 3.43 | 40.35 | 3.45  | 39.76 | 3.67 |

Source: Measured by Ms. Excel 2016 using combined datasets of RGC [32, 33]. "S.E." = Standard Error.

<sup>1</sup> *Disaster* measured as percentage of rice land damaged by floods, droughts, and insects to total rice actual harvested land within the year

<sup>2</sup> *Irrigation* measured as percentage of provincial paddy land having or benefit from irrigation systems as well as paddy land located near water sources to total provincial cultivated land within the year.

<sup>3</sup> *Production technique* measured as percentage of families cultivating rice under the SRI system to total rice cultivated families

<sup>4</sup> *Distant to information sources* measured as average distance from village center to the center of district/khan (in kilometers)

<sup>5</sup> *Agricultural supporting staffs* measured as percentage of agricultural staffs included both government officers and NGOs staffs (working on agricultural plans or projects) to total rice farmers existing in the province

<sup>6</sup> *Dry-season production* measured as percentage of paddy land actually harvested during dry season to the total available cultivated land for rice cultivation during dry season

<sup>7</sup> *Small-land farmers* measured as percentage of families having paddy land smaller than one hectare altogether with families having no paddy land to total rice families (i.e. families cultivating rice)

**Table 3.** Parameter estimates of SFA model

| <b>Variables</b>                             | <b>Coefficient</b> | <b>Standard Error</b> | <b>t-ratio</b> |
|----------------------------------------------|--------------------|-----------------------|----------------|
| <i>Constant</i>                              | -1.1869 *          | 0.6189                | -1.9178        |
| <i>Ln(land)</i>                              | 0.6796 ***         | 0.2475                | 2.7458         |
| <i>Ln(labor)</i>                             | 0.0775             | 0.3279                | 0.2364         |
| <i>Ln(fertilizer)</i>                        | 0.9245 **          | 0.4664                | 1.9820         |
| <i>Ln(pesticide)</i>                         | -1.8588 ***        | 0.3565                | -5.2139        |
| <i>Ln(machinery)</i>                         | 1.8642 ***         | 0.2629                | 7.0914         |
| <i>t</i>                                     | 0.0573             | 0.0369                | 1.5529         |
| <i>Land x Labor</i>                          | 0.0420 **          | 0.0197                | 2.1339         |
| <i>Land x Fertilizer</i>                     | -0.0771 *          | 0.0429                | -1.7966        |
| <i>Land x Pesticide</i>                      | 0.1680 ***         | 0.0309                | 5.4381         |
| <i>Land x Machinery</i>                      | -0.1210 ***        | 0.0241                | -5.0263        |
| <i>Labor x Machinery</i>                     | -0.0585 **         | 0.0271                | -2.1577        |
| <i>t<sup>2</sup></i>                         | 0.0013             | 0.0068                | 0.1888         |
| <i>Gamma (<math>\gamma</math>)</i>           | 1.0000 ***         | 0.0001                | 13,538.2280    |
| <i>Sigma-squared (<math>\sigma^2</math>)</i> | 0.0336 ***         | 0.0062                | 5.3882         |
| <b>Log likelihood function</b>               |                    |                       | <b>75.7787</b> |

Source: Estimated by FRONTIER 4.1c. \* indicates significant at 10%, \*\* significant at 5%, and \*\*\* at 1%.

**Table 4** Input elasticities of rice production in Cambodia, 2012-2015

| <b>Year</b> | <b>Ln(land)</b> | <b>Ln(labor)</b> | <b>Ln(fertilizer)</b> | <b>Ln(pesticide)</b> | <b>Ln(machinery)</b> |
|-------------|-----------------|------------------|-----------------------|----------------------|----------------------|
| 2012        | 0.9898          | 0.0465           | 0.0569                | 0.0317               | -0.1701              |
| 2013        | 0.9816          | 0.0340           | 0.0559                | 0.0339               | -0.1709              |
| 2014        | 0.9694          | 0.0248           | 0.0537                | 0.0386               | -0.1729              |
| 2015        | 0.9632          | 0.0156           | 0.0551                | 0.0356               | -0.1687              |

Source: Calculated by Ms. Excel 2016

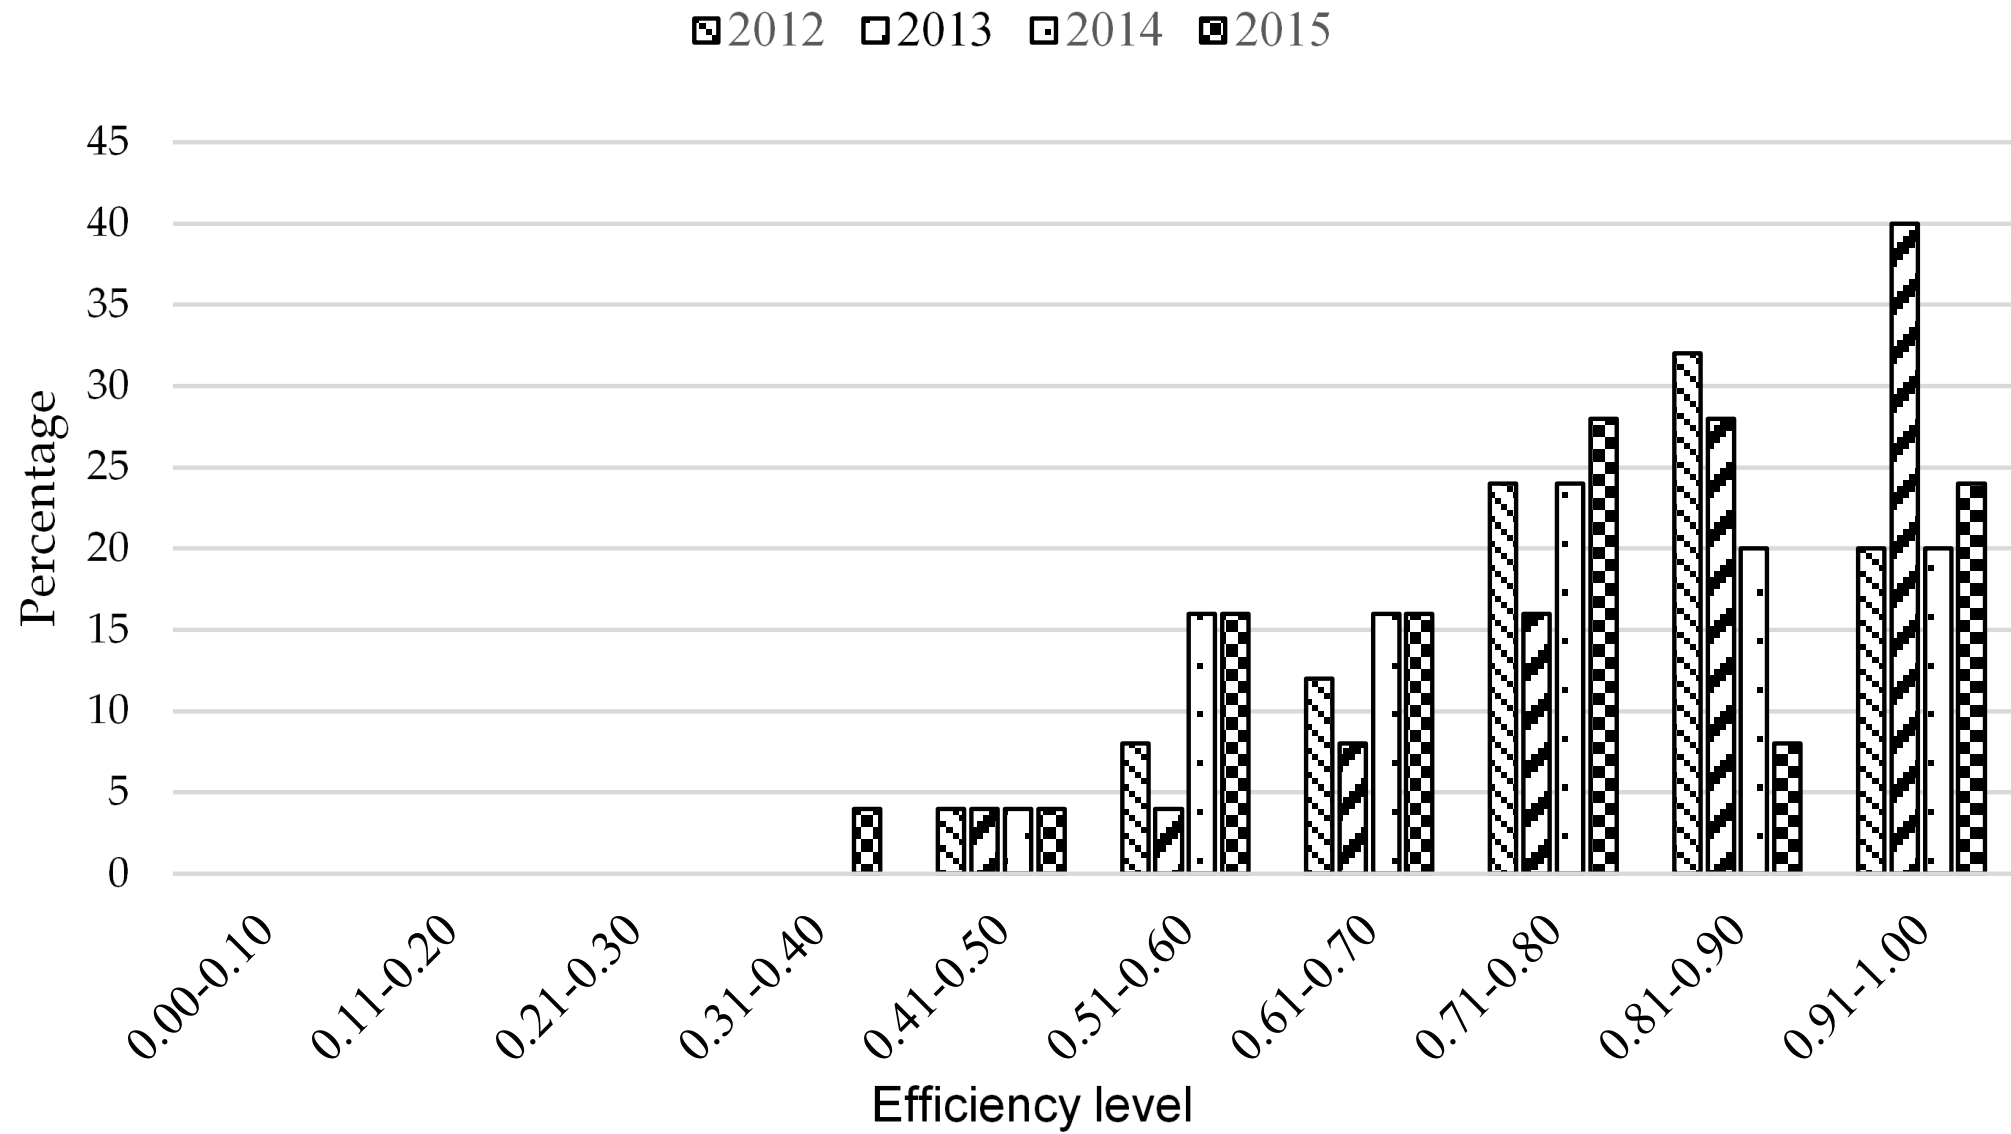

**Figure 2.** Distribution of Technical Efficiency

**Table 5** Regional technical efficiency of rice production in Cambodia, 2012-2015

| <b>Regions</b>                     | <b>2012</b> |             | <b>2013</b> |             | <b>2014</b> |             | <b>2015</b> |             | <b>TE Change (%)</b> |       |       |
|------------------------------------|-------------|-------------|-------------|-------------|-------------|-------------|-------------|-------------|----------------------|-------|-------|
|                                    | <i>M</i>    | <i>S.E.</i> | <i>M</i>    | <i>S.E.</i> | <i>M</i>    | <i>S.E.</i> | <i>M</i>    | <i>S.E.</i> | 12-13                | 12-14 | 12-15 |
| <i>Phnom Penh</i>                  | 0.83        | 0.00        | 0.84        | 0.00        | 0.81        | 0.00        | 0.61        | 0.00        | 1.2                  | -3.4  | -26.5 |
| <i>Tonle Sap plain<sup>1</sup></i> | 0.81        | 0.05        | 0.87        | 0.04        | 0.71        | 0.05        | 0.77        | 0.04        | 6.8                  | -12.4 | -5.4  |
| <i>Mekong plain<sup>2</sup></i>    | 0.86        | 0.07        | 0.89        | 0.10        | 0.88        | 0.07        | 0.88        | 0.07        | 3.2                  | 2.6   | 2.2   |
| <i>Mekong plateau<sup>3</sup></i>  | 0.79        | 0.04        | 0.79        | 0.04        | 0.74        | 0.06        | 0.70        | 0.06        | 0.0                  | -6.7  | -11.3 |
| <i>Mountain<sup>4</sup></i>        | 0.66        | 0.09        | 0.76        | 0.08        | 0.63        | 0.09        | 0.53        | 0.09        | 14.6                 | -5.7  | -19.7 |
| <i>Coastal<sup>5</sup></i>         | 0.81        | 0.07        | 0.84        | 0.06        | 0.86        | 0.09        | 0.79        | 0.08        | 4.7                  | 6.3   | -2.0  |
| <b>Cambodia</b>                    | 0.80        | 0.03        | 0.84        | 0.03        | 0.76        | 0.03        | 0.74        | 0.03        | 5.4                  | -3.9  | -6.9  |

Source: Estimated by FRONTIER 4.1c; “M” = Mean; “S.E.” = Standard Error; “12-13” = TE change between 2012 and 2013; “12-14” = TE change between 2012 and 2014; “12-15” = TE change between 2012 and 2015

<sup>1</sup> Tonle Sap plain region included the province of Banteay Meanchey, Battambang, Kampong Chhnang, Kampong Thom, Pailin, Pursat, and Siem Reap. Total area: 61,510 km<sup>2</sup> (accounted for 34.54% of the total area)

<sup>2</sup> Mekong plain included the province of Kampong Speu, Kandal, Prey Veng, Svay Rieng, and Takéo. Total area: 21,997 km<sup>2</sup> (12.35%)

<sup>3</sup> Mekong plateau included the province of Kampong Cham, Kratié, Stung Treng, and Tbong Khmoum. Total area: 31,663 km<sup>2</sup> (17.78%)

<sup>4</sup> Mountain region included the province of Mondulkiri, Ratanakiri, Preh Vihear, and Oddar Meanchey. Total area: 45,016 km<sup>2</sup> (25.28%)

<sup>5</sup> Coastal region included the province of Kampot, Koh Kong, Kep, and Preah Sihanouk. Total area: 17,237 km<sup>2</sup> (9.68%)

**Table 6.** Rice production technical inefficiency model parameters estimation

| <b>Variables</b>                      | <b>Coefficient</b> | <b>Std. Error</b> | <b>t-ratio</b> |
|---------------------------------------|--------------------|-------------------|----------------|
| <i>Constant</i>                       | 0.9241 ***         | 0.1484            | 6.2261         |
| <i>Disaster</i>                       | 0.0003             | 0.0005            | 0.5641         |
| <i>Irrigation</i>                     | -0.0119 ***        | 0.0026            | -4.5368        |
| <i>Production technique</i>           | -0.0841 ***        | 0.0283            | -2.9688        |
| <i>Distant to information sources</i> | -0.0052            | 0.0060            | -0.8703        |
| <i>Agricultural supporting staffs</i> | -0.9530 **         | 0.4032            | -2.3635        |
| <i>Dry-season production</i>          | -0.0016            | 0.0016            | -1.0549        |
| <i>Small-land farmers</i>             | -0.0007            | 0.0036            | -0.2056        |

Source: Estimated by FRONTIER 4.1c. \* indicates significant at 10%, \*\* significant at 5%, and \*\*\* at 1%.
